# Supplementary material for: The primary familial brain calcification-associated protein MYORG is an α-galactosidase with restricted substrate specificity
Source: PubMed Central journal article supplement (PMC9491548; doi:10.1371/journal.pbio.3001764), 2022-09-21
Supplement: pbio.3001764.s001.pdf [file pbio.3001764.s001.pdf]

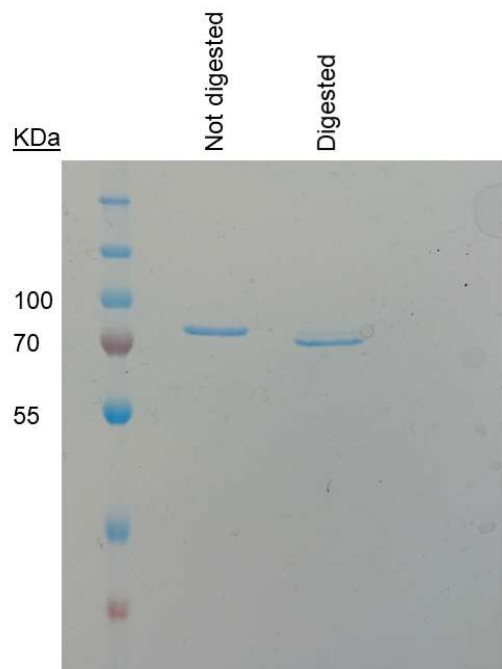

**Figure S1. SDS-PAGE gel displaying both fully glycosylated MYORG and MYORG after EndoH treatment. A clear reduction in size is seen upon digestion indicating removal of glycans.**
