# Supplementary material for: The primary familial brain calcification-associated protein MYORG is an α-galactosidase with restricted substrate specificity
Source: PubMed Central journal article supplement (PMC9491548; doi:10.1371/journal.pbio.3001764), 2022-09-21
Supplement: pbio.3001764.s002.pdf [file pbio.3001764.s002.pdf]

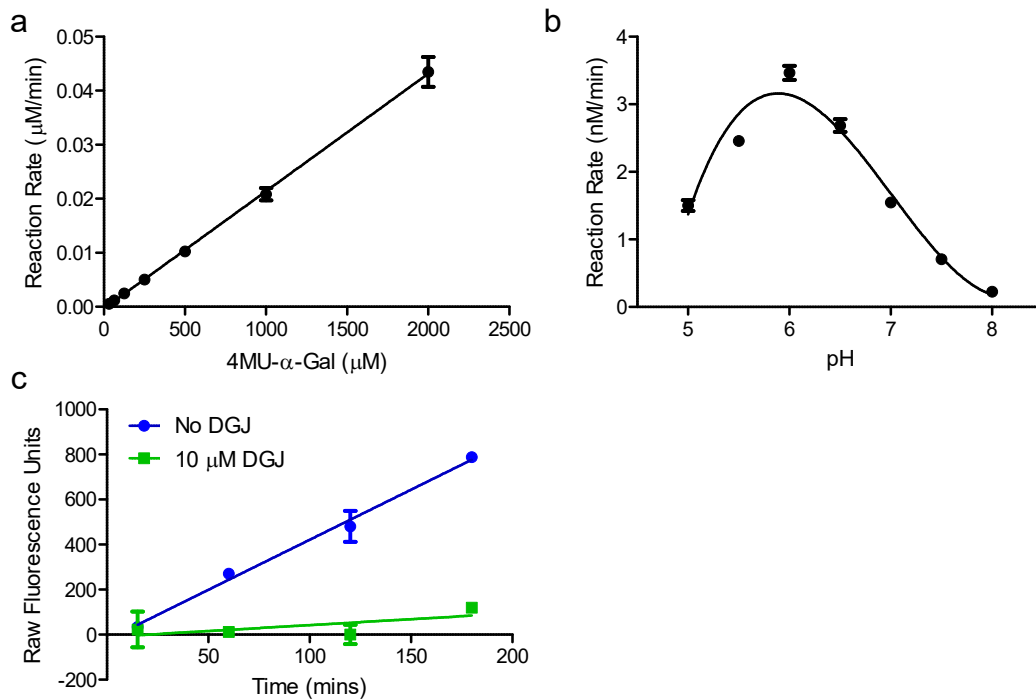

**Figure S2. Analysis of MYORG kinetics against 4MU- $\alpha$ -D-galactopyranoside.** **a**, Michaelis-Menten plot,  $k_{cat}/K_M$  was estimated from linear regression analysis. Three technical replicates  $\pm$  standard error. **b**, pH activity profile of MYORG assayed in varying pH phosphate-citrate buffer. Three technical replicates  $\pm$  standard error. **c**, Activity of MYORG in the presence and absence of 10  $\mu$ M DGJ. Three technical replicates  $\pm$  standard deviation. All raw data underlying graphs can be found in S1\_Data.
