# Supplementary material for: The primary familial brain calcification-associated protein MYORG is an α-galactosidase with restricted substrate specificity
Source: PubMed Central journal article supplement (PMC9491548; doi:10.1371/journal.pbio.3001764), 2022-09-21
Supplement: pbio.3001764.s003.pdf [file pbio.3001764.s003.pdf]

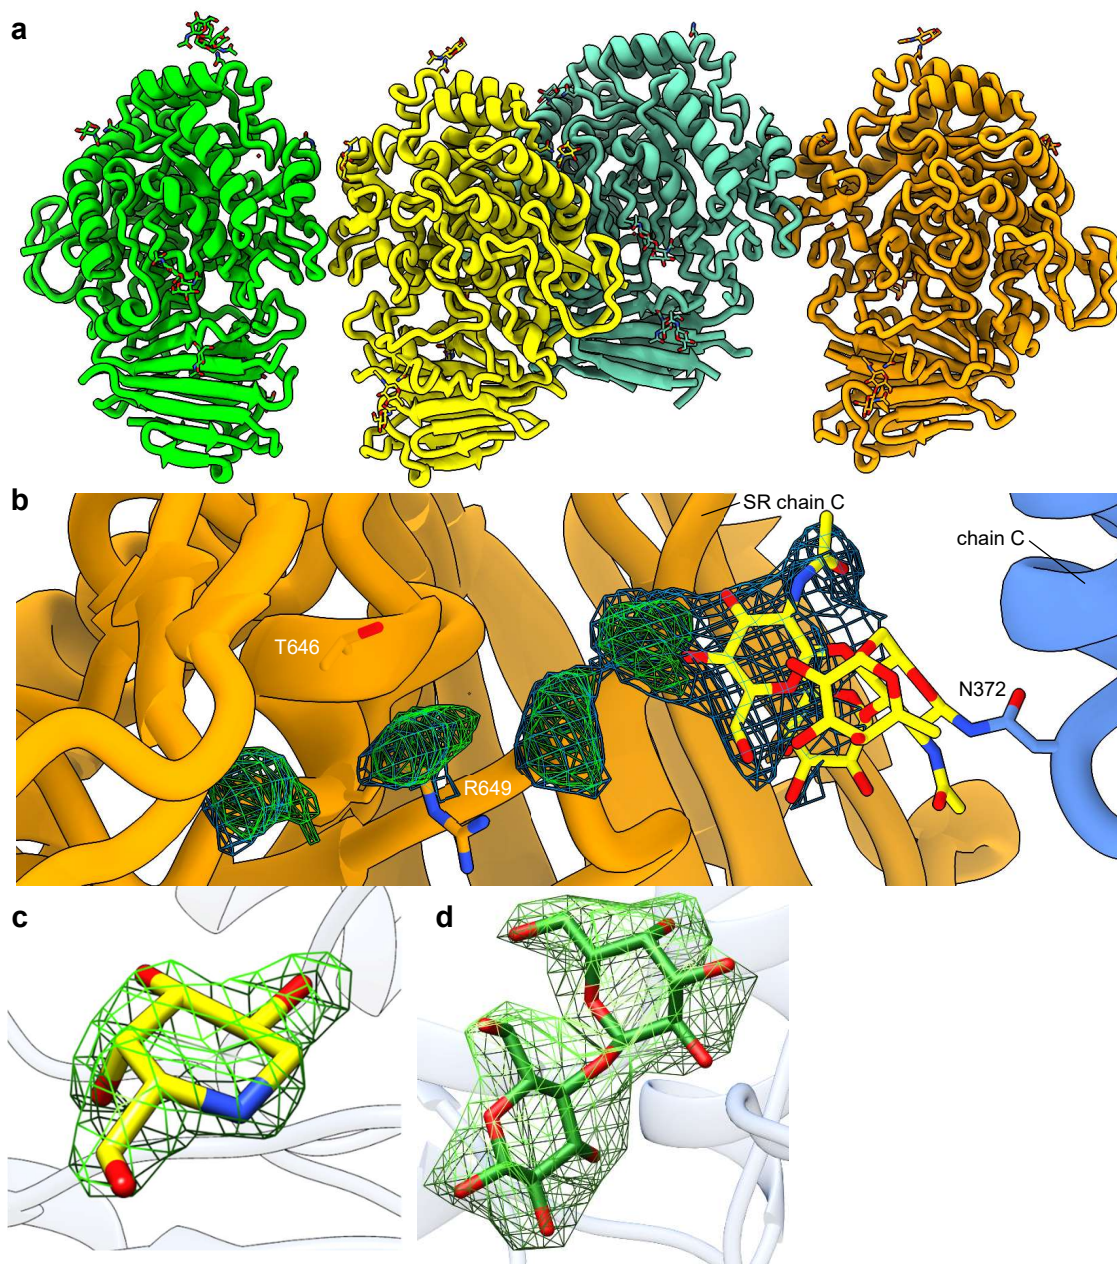

**Figure S3. ASU contents and electron density figures.** **a**, the asymmetric unit of MYORG. Four copies of MYORG depicted as cartoon ribbons comprise the ASU. Green and yellow chains form a dimer, as do the blue and orange chains. **b**, Transient crystal contacts likely provided by extension of the N-glycosylated N372 glycan.  $F_o-F_c$  (green mesh, 3  $\sigma$  contour) and  $2F_o-F_c$  (blue mesh, 1  $\sigma$  contour) electron density generated from the final model indicate the last modelled GlcNAc unit is extended further, however the electron density is too diffuse to accurately model further sugar units. SR, symmetry-related chain. **c**, Omit  $F_o-F_c$  electron density map for DGJ contoured to 3  $\sigma$ . DGJ is superimposed onto the density to indicate placement. **d**, Omit  $F_o-F_c$  electron density for Gal- $\alpha$ 1,4-Glc contoured to 3  $\sigma$ . Gal- $\alpha$ 1,4-Glc is superimposed onto the density to indicate placement.
