# Supplementary material for: The primary familial brain calcification-associated protein MYORG is an α-galactosidase with restricted substrate specificity
Source: PubMed Central journal article supplement (PMC9491548; doi:10.1371/journal.pbio.3001764), 2022-09-21
Supplement: pbio.3001764.s004.pdf [file pbio.3001764.s004.pdf]

1 10  
HsMYORG .....MLQNP.QEKSQAYPRRRRP  
PsGal31A .....  
EcYihQ .....  
EcYicI .....MKISDGNWLIQP  
FjDex31A MKKSIFYCCVIFCIMVSYQAYSQKKEQYLGNCCTAYSVKGNKVVVFSCANNSKI.....M.  
Mm\_aGlu-II MA.....ATAA VAARRRRSWSLSLVLAYLGVCLGITLAVDRSNFKTCDDESSFCRQR SIRP

20 30 40  
HsMYORG GCYAYRQNPEAIA.....AAAMYTFLP.....  
PsGal31A .....  
EcYihQ .....  
EcYicI GLNLIH.....PLOVFEVEQQDNEMVVYA...APRDVRERT  
FjDex31A .....LQLCS.....GEVVKIWAS...ADGNFVR.....NNESFAV  
Mm\_aGlu-II GLSPYRALLDLTLQGLPDALTVHLIHEVTKVLVLELQGLQKNMTRIRIDELEPRRPRYRV

50 60  
HsMYORG .....DNFSPAKPK.....PSKDLKPLLGSVAVLGLLL  
PsGal31A .....MN.....KFKKLIQLFCILLFVA.LFYTS  
EcYihQ .....MDTPRPQLLDFQ.....FHQNNDSFTLHFQQRLLILTH  
EcYicI ...WQLDTPLETLRFFSPQEGIVGV...RIEHFQGA...LNNNGPHYPLINILQDVKVTI  
FjDex31A IE.....EDLGW...KGNVTVKEEPSTYEFTEQLRIRVNNKAPFQLQIFDKYQKLL  
Mm\_aGlu-II PDVLVADPPPTARLSV...SGR...DDNSVELTVAEGPYKIIILTAQPERLDLLEDRLSL

70 80 90 100  
HsMYORG VLAAVVAVCY...YSVSLRKAERLRAELLDLKAAGFSIRNQKGE.....  
PsGal31A SHAQTANWTEIYPGV...WKATVGPESYDLLKAAGAQPNDK.....ALSK  
EcYihQ SKDNPCLEWIGSGIADDMF.....RGNFSIKDK...LQEKIALTDATVVSQS  
EcYicI ENT.....ERYAEFKS.....GNL.....SARVSK  
FjDex31A FSD...YAEKGFVN.....DNG.....  
Mm\_aGlu-II SVN.....ARGLMAFEHQRAPRVPQESKDP AEGNGAQPEATPGDGDKPEETQEKAEKDE

110 120 130  
HsMYORG .QVFRLAFRSGALDLD.....SRDQALIGCSLIT  
PsGal31A TEKVSPFPFANGGVV.....LEVSGGKTYLRFPILQKEEQLYGFGGLN  
EcYihQ PDGWLIFSRGSDISATLNISADDQGRLLLELQNDNLNHNRIWLRLAQPEDEHIYCGGEGEQ  
EcYicI GEFWSLDFLRNGERITGSQVKN.....NGYVQDTNNQRNYMFERLDLGVGETVYGLGER  
FjDex31A .....KIRTNKVLRNDEQFEGLGEK  
Mm\_aGlu-II PGAWREETFKTHSDS.....K.....PY.....GPTSVGLDFS LFGMEHVYGTPEH

140 150 160 170 180  
HsMYORG ADG.....LPLHFFIQTVRPKDVMCYRVRWEEAAPGRAVEHAMFLGDAAAHWYGG  
PsGal31A FQT.....VHQRCIKILELHVD.....H...YGGK  
EcYihQ FSY...FDLRGKPFPLWTS.....EQGVGRNK.....  
EcYicI FTA...LVRNGQTVETWNR...DGG...T.....  
FjDex31A SGN...LNRRGSAYKMWNS.....DQPCYGVN.....  
Mm\_aGlu-II ADSLRLKVTIEGGEPEYRLYNL.....DVFQYELN.....

190 200 210 220 230 240  
HsMYORG AEMRTQHWPIRLD.....GQQEPQPFVTSDDVYSSDAAFGGILERYWLSRRAAAIKVN  
PsGal31A .D.SGRT.....HAPTFFYVSS...N...GYG...VFINSARYIK...  
EcYihQ .Q.TYVTWQADCKENAGGDYWTFFPQPTFVST...Q...KYY...CHVDNRCYMN...  
EcYicI .S.TEQA.....YKNIFFYMTN...R...GYG...VLVNHPPQCVS...  
FjDex31A .E..DPL.....YKSIFFMSS...Y...RYG...IFFDNITYKTE...  
Mm\_aGlu-II .N.PMAL.....YGSVPVLLAHSFHR..DLG...IFWLNAAETW...

250 260 270 280 290  
HsMYORG DSVPFHLGWNSTERSLRLQ...ARY...HDTPYKPP.AGRAAAPEISYRVCVGSVDVTS  
PsGal31A ...VWAGTGVKRDSENFPTPKDRNTDKTWSSRPYSDAVEILLVPAEGVEVYVFGGPKPID  
EcYihQ ...FDFAPEY.....HELALWEDK...ATLRFECADTYIS  
EcYicI ...FEVG.....SEKVSQVQFSESEYLEYFVIDGPTPKA  
FjDex31A ...FKFG.....SESNDYYSFEAPAGQMVVYFMMGNDYKE  
Mm\_aGlu-II ...VDISSNTAGKT.LFGKMLDYL...QGSGETPQTDIRWMSSEGTIDVFLMLGSPSVFD

300 310 320 330 340 350  
HsMYORG IHKYMVRRYFNKPSRVPAPAEAFRDPVSTWALYGRAVDQDKVLRFAQQIRLHHFNSSSHLE  
PsGal31A ...AVKRYNLLNGGGYLPFRWGLGFTQRVM...TRYTDKDVKEKVNDFKEKGYPLDFVVG  
EcYihQ ...LLEKLTALLGRQPELDPDWIYDGVTLGI...QG...GTEVCQKKLDMRNRAGVKVNGIWI  
EcYicI ...VLDRYTRFTGRPALPPAWSPGLWLTTS.FTTNYDEATVNSFIDGMAEARNLPLHVFH  
FjDex31A ...IIQNYIALTGKPIMPKVALGFSQCRG...DYTREDQAREIAAEFRKRKIPCDIYI  
Mm\_aGlu-II ...VFRQYASLTGTQALPPLFSLGYHQSRW...NYRDEADVLEVDQGFDDHNMPCDVIW

360 370 380 390 400  
HsMYORG IDD.....MYTPAYGDFFDFDEVKFPNASDMFRRLRDAQFRVITLWVHFFVNYNSS..R  
PsGal31A LEP...GWQS...KAYPGTFSWDKSRYPDPTSFVKKMKDQGIIRLNLWINPYISPDAFF..  
EcYihQ AQDWSGIRMTSFGKRWMMWKKWNSENYPLQDSRIKQWNQGVQVFLAYINPYVASDKD..L  
EcYicI FDC...FW..MKAFQWCDFEWDPLTFPDPPEGMIRRLKARGLKICVWINPYIGQKSP..V  
FjDex31A QDI...GW..TEGLQ..DFDWKRNYYNNPKGMVKDLSDMGFKMIVSQDPPVISQANQQQW  
Mm\_aGlu-II LDI...EH..ADGKR..YETWDPTRFPQPLNMLEHLASKRKLVAIVDPHTIKVDSGYRV

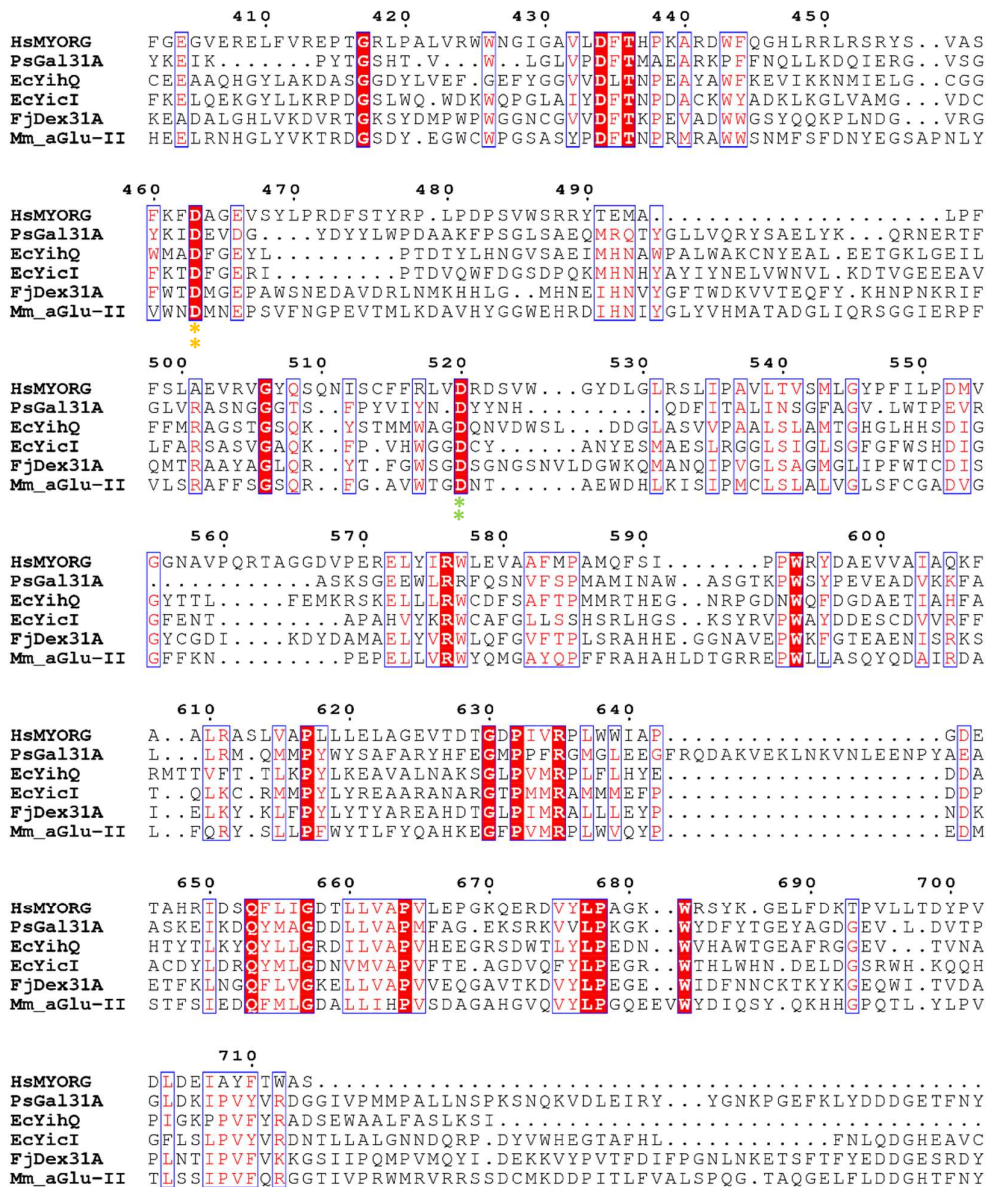

**Figure S4. Sequence alignment of MYORG against other CAZy GH31 family enzymes.** Sequence numbered relative to MYORG. Orange double asterisk indicates nucleophile residue. Green double asterisk indicates acid/base residue. UniProt identifiers: Q6NSJ0 (*HsMYORG*), A0A0F7R6D6 (*PsGal31A*), P32138 (*EcYihQ*), P31434 (*EcYicI*), A5FB11 (*FjDex31A*) and Q8BHN3 (*Mma $\alpha$ -Glu II*).
