# Supplementary material for: The primary familial brain calcification-associated protein MYORG is an α-galactosidase with restricted substrate specificity
Source: PubMed Central journal article supplement (PMC9491548; doi:10.1371/journal.pbio.3001764), 2022-09-21
Supplement: pbio.3001764.s005.pdf [file pbio.3001764.s005.pdf]

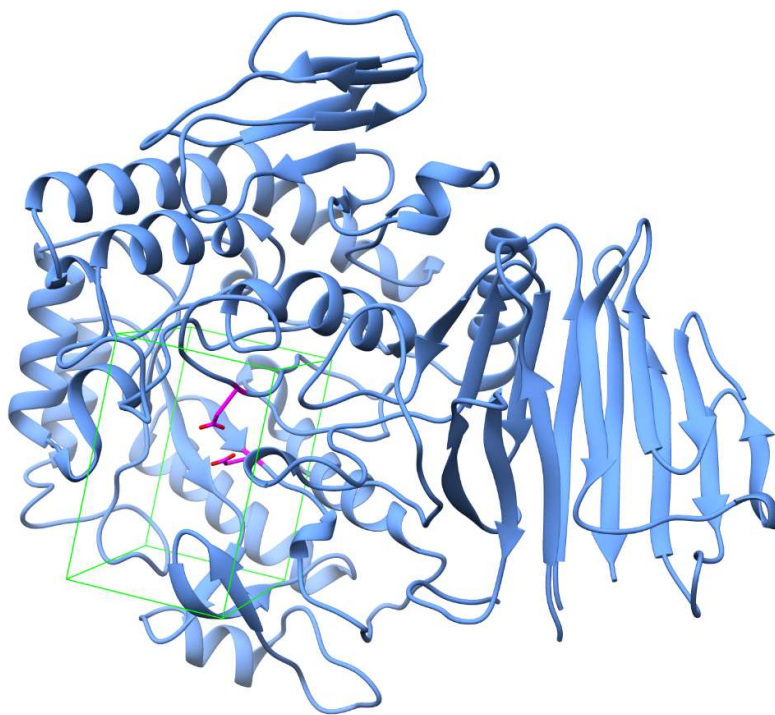

**Figure S5. The region of MYORG used for docking simulations.** Chain B of MYORG from the MYORG-Gal- $\alpha$ 1,4-Glc complex was used for docking. Docking region enclosed in green square. Acid/base and nucleophile residue coloured in magenta.
