# Supplementary material for: The primary familial brain calcification-associated protein MYORG is an α-galactosidase with restricted substrate specificity
Source: PubMed Central journal article supplement (PMC9491548; doi:10.1371/journal.pbio.3001764), 2022-09-21
Supplement: pbio.3001764.s006.pdf [file pbio.3001764.s006.pdf]

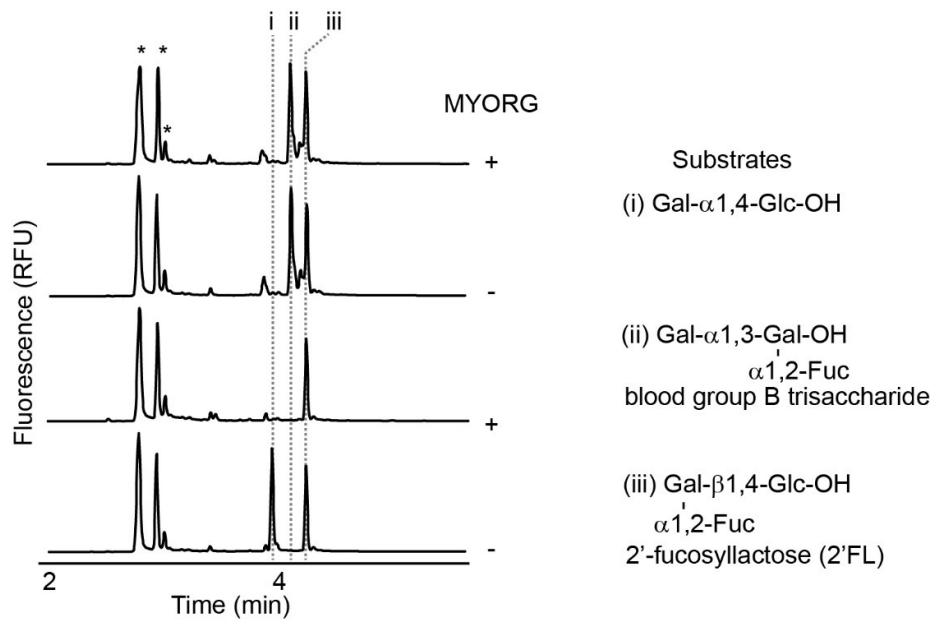

**Figure S6. Representative CE-LIF electropherograms for candidate MYORG substrates.** MYORG-active substrate (i) Gal- $\alpha$ 1,4-Glc, MYORG-resistant substrate (ii) blood group B trisaccharide, and (iii) 2'-Fucosyllactose, which was included as an internal standard in all reactions. Peaks denoted with an asterisks (\*) are due to excess fluorogenic reagents. Note that monosaccharides are lost during the desalting process prior to fluorescent labelling.
