# Supplementary material for: The primary familial brain calcification-associated protein MYORG is an α-galactosidase with restricted substrate specificity
Source: PubMed Central journal article supplement (PMC9491548; doi:10.1371/journal.pbio.3001764), 2022-09-21
Supplement: pbio.3001764.s007.pdf [file pbio.3001764.s007.pdf]

**Table S1. Mutations identified in MYORG that cause PFBC and the associated structural consequences.**

| DNA change                    | Amino acid change               | Location            | Effect                                                                                                                                                          | Original Reference |
|-------------------------------|---------------------------------|---------------------|-----------------------------------------------------------------------------------------------------------------------------------------------------------------|--------------------|
| c.103 A>G                     | M35V                            | N-terminal region   | - Unknown                                                                                                                                                       | (1)                |
| c.104 T>A                     | M35K                            | N-terminal region   | - Unknown                                                                                                                                                       | (2)                |
| c.191 G>A                     | G64E                            | Transmembrane helix | - Unknown                                                                                                                                                       | (3)                |
| c.225 G>A                     | W75*                            | Transmembrane helix | - Severe truncation of protein.                                                                                                                                 | (1)                |
| c.285-310 del insert TTC      | L95 fs                          | N-terminal domain   | - Incorrect protein sequence from L95                                                                                                                           | (4)                |
| c.337-348 dup                 | L113-R116 dup                   | N-terminal domain   | - General disruption of protein fold.                                                                                                                           | (5)                |
| c.338 T>G                     | L113R                           | N-terminal domain   | - Disruption of hydrophobic core through steric clashes, caused by introduction of a large, charged sidechain.                                                  | (3)                |
| c.348-349 insert CTGGCCTTCCGC | 116-117 insert LAFR             | N-terminal domain   | - General disruption of protein fold.                                                                                                                           | (1)                |
|                               | 125-132 del CSRDGALL and insert | N-terminal domain   | - Loss of stabilising di-sulphide bond.<br>- General disruption of protein fold                                                                                 | (6)                |
| c.428_442 del TGCACTTCTTCATCC | 143_147 del LHFFI               | N-terminal domain   | - General disruption of protein fold                                                                                                                            | (7)                |
| c.535-536 insert C            | G179 fs                         | N-terminal domain   | - Incorrect protein sequence from G179                                                                                                                          | (4)                |
| c.607 C>T                     | Q203*                           | N-terminal domain   | - Severe truncation of protein                                                                                                                                  | (1)                |
| c.679 C>G                     | R227G                           | N-terminal domain   | - Loss of hydrogen bonding sidechain. R227 likely to aid in positioning of the loop carrying D213 (possible involved in binding polysaccharides at active site) | (8)                |
| c.687 G>T                     | W229C                           | N-terminal domain   | - Disruption of stabilising hydrophobic core.                                                                                                                   | (7)                |
| c.695 C>T                     | S232L                           | N-terminal domain   | - General disruption of structure through introduction of a larger sidechain causing steric clashes.                                                            | (1)                |
| c.706_708 dup GCC             | A236 dup                        | N-terminal domain   | - Insertion of additional residue into $\beta$ -sheet.                                                                                                          | (3)                |
| c.747G>C                      | W249C                           | N-terminal domain   | - Disruption of stabilising hydrophobic core.                                                                                                                   | (3)                |

|                      |                |                   |                                                                                                                                                                                 |      |
|----------------------|----------------|-------------------|---------------------------------------------------------------------------------------------------------------------------------------------------------------------------------|------|
| c.782-783 GC>TT      | R261L          | N-terminal domain | - Disruption of hydrogen bonding involved in the positioning of the loop carrying the likely active site residue D213.<br>-Introduction of hydrophobic facing solvent           | (1)  |
| c.782 G>T            | R261L          |                   |                                                                                                                                                                                 | (8)  |
| c.794 C>T            | T265M          | N-terminal domain | -Introduction of a bulky hydrophobic residue causing loop disruption.                                                                                                           | (9)  |
| c.830 del C          | P277 fs        | N-terminal domain | - Incorrect protein sequence from P277                                                                                                                                          | (10) |
| c.850 T>C            | C284R          | N-terminal domain | -Breaks a disulphide bond and introduces a bulky charged residue causing fold disruption.                                                                                       | (2)  |
| c.854_855 dup TG     | G286W fs       | N-terminal domain | - Loss of catalytic domain                                                                                                                                                      | (11) |
| c.856 G>A            | G286S          | N-terminal domain | -possible disruption of hydrophobic network affecting N-terminal domain fold.                                                                                                   | (12) |
| c.893 G>C            | R298P          | Catalytic domain  | - Disruption of $\alpha$ -helix                                                                                                                                                 | (8)  |
| c.940 C>T            | R314*          | Catalytic domain  | - Severe truncation of catalytic domain                                                                                                                                         | (6)  |
| c.1060_1062delGAC    | 354 del D      | Catalytic domain  | - D354 is found in an active site loop, mutation would disrupt bonding of D353 to substrate and may also cause larger, global structural changes to MYORG through residue loss. | (13) |
| c.1078 del T         | Y360 fs        | Catalytic domain  | - Loss of catalytic domain                                                                                                                                                      | (3)  |
| c.1092-1097delCTTCGA | 365-366 del FD | Catalytic domain  | - F365 forms part of a hydrophobic core<br>- General disruption of protein fold                                                                                                 | (1)  |
| c.1118 C>A           | A373D          | Catalytic domain  | - Would cause steric clash leading to $\alpha$ -helix displacement.<br>- May make N372 unavailable for glycosylation, possibly affecting protein production.                    | (3)  |
| c.1233delC           | F411L + fs     | Insert            | - Loss of catalytic domain.                                                                                                                                                     | (13) |
| c.1300 G>C           | D434H          | Insert            | - Introduction of severe steric clashes.                                                                                                                                        | (3)  |
| c.1321 C>G           | R441G          | Catalytic domain  | - Loss of stabilising salt bridge.                                                                                                                                              | (1)  |

|                     |           |                                |                                                                                                                                                                                                  |      |
|---------------------|-----------|--------------------------------|--------------------------------------------------------------------------------------------------------------------------------------------------------------------------------------------------|------|
| c.1328 G>A          | W443*     | Catalytic domain               | - Loss of catalytic domain                                                                                                                                                                       | (1)  |
| c.1333 C>T          | Q445*     | Catalytic domain               | - Loss of catalytic domain                                                                                                                                                                       | (14) |
| c.1394 dup G        | E466 fs   | Catalytic domain               | - Loss of catalytic domain                                                                                                                                                                       | (3)  |
| c.1427 C>A          | T476N     | Catalytic domain               | - Likely to cause steric clashes.                                                                                                                                                                | (3)  |
| c.1431 C>A          | Y477*     | Catalytic domain               | - Loss of catalytic domain                                                                                                                                                                       | (7)  |
| c.1530 del G        | N511T fs  | Catalytic domain               | - Loss of catalytic domain                                                                                                                                                                       | (15) |
| c.1511 G>C          | R504P     | Catalytic domain               | - Conserved residue associated with binding sugar substrates.                                                                                                                                    | (8)  |
| c.1538_1540 del CCT | 513 del S | Catalytic domain               | - Loss of stabilising hydrogen bond.<br>- Would alter positioning of N511 possibly hindering glycosylation and protein processing.<br>- Global structural issues likely from loss of amino acid. | (3)  |
| c.1802_1804 del TGG | 601 del V | Catalytic domain               | - Loss of amino acid in $\alpha$ -helix affecting register/fold.                                                                                                                                 | (8)  |
| c.1831 C>T          | R611W     | Catalytic domain               | - Disruption of important hydrogen bonding network.<br>- Severe steric clashes introduced.                                                                                                       | (3)  |
| c.1865 T>C          | L622P     | Catalytic domain               | - Disruption of $\alpha$ -helix                                                                                                                                                                  | (3)  |
| c.1967 T>C          | I656T     | Proximal $\beta$ -sheet domain | - Disruption of stabilising hydrophobic core, anchoring proximal $\beta$ -sheet domain to catalytic domain.                                                                                      | (16) |
| c.1979 T>A          | L660Q     | Proximal $\beta$ -sheet domain | - Disruption of stabilising hydrophobic core, anchoring proximal $\beta$ -sheet domain to catalytic domain.                                                                                      | (3)  |

## References

1. Yao XP, Cheng X, Wang C, Zhao M, Guo XX, Su HZ, et al. Biallelic Mutations in MYORG Cause Autosomal Recessive Primary Familial Brain Calcification. *Neuron*. 2018;98(6):1116-23.e5.
2. Chen SY, Lin WC, Chang YY, Lin TK, Lan MY. Brain hypoperfusion and nigrostriatal dopaminergic dysfunction in primary familial brain calcification caused by novel MYORG variants: case report. *BMC Neurol*. 2020;20(1):329.
3. Grangeon L, Wallon D, Charbonnier C, Quenez O, Richard AC, Rousseau S, et al. Biallelic MYORG mutation carriers exhibit primary brain calcification with a distinct phenotype. *Brain*. 2019;142(6):1573-86.
4. Malaquias MJ, Martins RC, Oliveira J, Freixo JP, Magalhães M. MYORG gene disease-causing variants in a family with primary familial brain calcification presenting with stroke-like episodes. *Clin Genet*. 2020;98(5):517-9.
5. Du J, Zhu X, Liu J, Tan Y. Paroxysmal Kinesigenic Dyskinesia Secondary to Brain Calcification with a Homozygous MYORG Mutation. *Mov Disord*. 2021.
6. Taglia I, Kuipers DJS, Breedveld GJ, Mignarri A, Dotti MT, Federico A, et al. Primary familial brain calcification caused by MYORG mutations in an Italian family. *Parkinsonism Relat Disord*. 2019;67:24-6.
7. Chen Y, Fu F, Chen S, Cen Z, Tang H, Huang J, et al. Evaluation of MYORG mutations as a novel cause of primary familial brain calcification. *Mov Disord*. 2019;34(2):291-7.
8. Chen Y, Cen Z, Chen X, Wang H, Chen S, Yang D, et al. MYORG Mutation Heterozygosity Is Associated With Brain Calcification. *Mov Disord*. 2020;35(4):679-86.
9. Kume K, Takata T, Morino H, Matsuda Y, Ohsawa R, Tada Y, et al. The first Japanese case of primary familial brain calcification caused by an MYORG variant. *J Hum Genet*. 2020;65(10):917-20.
10. Gao L, Chen J, Dong H, Li X. A novel mutation in MYORG leads to primary familial brain calcification and cerebral infarction. *Int J Neurosci*. 2021:1-5.
11. Ferreira LD, de Oliveira JRM. New homozygous indel in MYORG linked to brain calcification, thyroidopathy and neuropathy. *Brain*. 2019;142(9):e51.
12. Tekin Orgun L, Besen Ş, Sangün Ö, Bisgin A, Alkan Ö, Erol İ. First pediatric case with primary familial brain calcification due to a novel variant on the MYORG gene and review of the literature. *Brain Dev*. 2021;43(7):789-97.
13. Arkadir D, Lossos A, Rahat D, Abu Snineh M, Schueler-Furman O, Nitschke S, et al. MYORG is associated with recessive primary familial brain calcification. *Ann Clin Transl Neurol*. 2019;6(1):106-13.
14. Peng Y, Wang P, Chen Z, Jiang H. A novel mutation in MYORG causes primary familial brain calcification with central neuropathic pain. *Clin Genet*. 2019;95(3):433-5.
15. Ramos EM, Roca A, Chumchim N, Dokuru DR, Van Berlo V, De Michele G, et al. Primary familial brain calcification caused by a novel homozygous MYORG mutation in a consanguineous Italian family. *Neurogenetics*. 2019;20(2):99-102.
16. Forouhideh Y, Müller K, Ruf W, Assi M, Seker T, Tunca C, et al. A biallelic mutation links MYORG to autosomal-recessive primary familial brain calcification. *Brain*. 2019;142(2):e4.
