# Supplementary material for: The primary familial brain calcification-associated protein MYORG is an α-galactosidase with restricted substrate specificity
Source: PubMed Central journal article supplement (PMC9491548; doi:10.1371/journal.pbio.3001764), 2022-09-21
Supplement: pbio.3001764.s008.pdf [file pbio.3001764.s008.pdf]

**Table S2. Data collection and refinement statistics for MYORG.** Values in parenthesis are for highest-resolution shell. Each dataset was derived from a single crystal.

|                                      | Unliganded        | DGJ complex       | Gal- $\alpha$ 1,4-Glc complex |
|--------------------------------------|-------------------|-------------------|-------------------------------|
| Accession code                       | 7QQF              | 7QQG              | 7QQH                          |
| <b>Data Collection</b>               |                   |                   |                               |
| Spacegroup                           | <i>P</i> 1        | <i>P</i> 1        | <i>P</i> 1                    |
| Cell dimensions                      |                   |                   |                               |
| a, b, c (Å)                          | 74.1, 79.0, 180.1 | 73.1, 78.9, 176.2 | 73.3, 79.1, 178.0             |
| $\alpha$ , $\beta$ , $\gamma$ (°)    | 88.1, 78.8, 62.7  | 80.8, 80.2, 62.6  | 80.9, 79.1, 62.7              |
| Resolution (Å)                       | 66.57-2.43        | 69.75-2.43        | 64.53-2.25                    |
| R <sub>meas</sub>                    | 0.093 (1.514)     | 0.103 (1.024)     | 0.103 (1.131)                 |
| R <sub>p.i.m</sub>                   | 0.066 (1.071)     | 0.073 (0.724)     | 0.073 (0.8)                   |
| <i>I</i> / $\sigma$ <i>I</i>         | 8.2 (1.0)         | 8.4 (1.4)         | 7.9 (1.0)                     |
| CC <sub>1/2</sub>                    | 0.983 (0.515)     | 0.995 (0.555)     | 0.99 (0.962)                  |
| Completeness                         | 98.2 (96.9)       | 98.3 (97.4)       | 98.2 (96.7)                   |
| Multiplicity                         | 2.2 (2.1)         | 3.5 (3.7)         | 3.1 (3.1)                     |
| <b>Refinement</b>                    |                   |                   |                               |
| Resolution                           | 66.66-2.43        | 69.85-2.43        | 64.61-2.25                    |
| No. of reflections                   | 125031            | 120841            | 153878                        |
| R <sub>work</sub> /R <sub>free</sub> | 0.211/0.233       | 0.224/0.250       | 0.212/0.227                   |
| No. of atoms                         |                   |                   |                               |
| Protein                              | 19414             | 18863             | 19824                         |
| Ligand                               | 531               | 404               | 520                           |
| Water                                | 319               | 233               | 486                           |
| <i>B</i> -factors                    |                   |                   |                               |
| Protein                              | 62.83             | 61.05             | 54.39                         |
| Ligands                              | 82.15             | 67.97             | 59.76                         |
| Waters                               | 48.75             | 48.89             | 47.12                         |
| R.m.s. deviations                    |                   |                   |                               |
| Bond angles (°)                      | 1.377             | 1.428             | 1.311                         |
| Bond lengths (Å)                     | 0.0046            | 0.0060            | 0.0041                        |
