# Supplementary material for: The primary familial brain calcification-associated protein MYORG is an α-galactosidase with restricted substrate specificity
Source: PubMed Central journal article supplement (PMC9491548; doi:10.1371/journal.pbio.3001764), 2022-09-21
Supplement: pbio.3001764.s009.pdf [file pbio.3001764.s009.pdf]

**Table S3. Isothermal titration calorimetry results for MYORG.** Values are the mean of two technical repeats  $\pm$  standard deviations.

| Compound | $K_D$ ( $\mu\text{M}$ ) | $\Delta H$ ( $\text{kcal mol}^{-1}$ ) | $\Delta G$ ( $\text{kcal mol}^{-1}$ ) | $-T\Delta S$ ( $\text{kcal mol}^{-1}$ ) |
|----------|-------------------------|---------------------------------------|---------------------------------------|-----------------------------------------|
| DGJ      | $1.33 \pm 0.45$         | $-7.56 \pm 0.21$                      | $-8.04 \pm 0.21$                      | $-0.48 \pm 0.85$                        |
