# Supplementary material for: The primary familial brain calcification-associated protein MYORG is an α-galactosidase with restricted substrate specificity
Source: PubMed Central journal article supplement (PMC9491548; doi:10.1371/journal.pbio.3001764), 2022-09-21

Original unmodified gel picture taken for Figure S1.

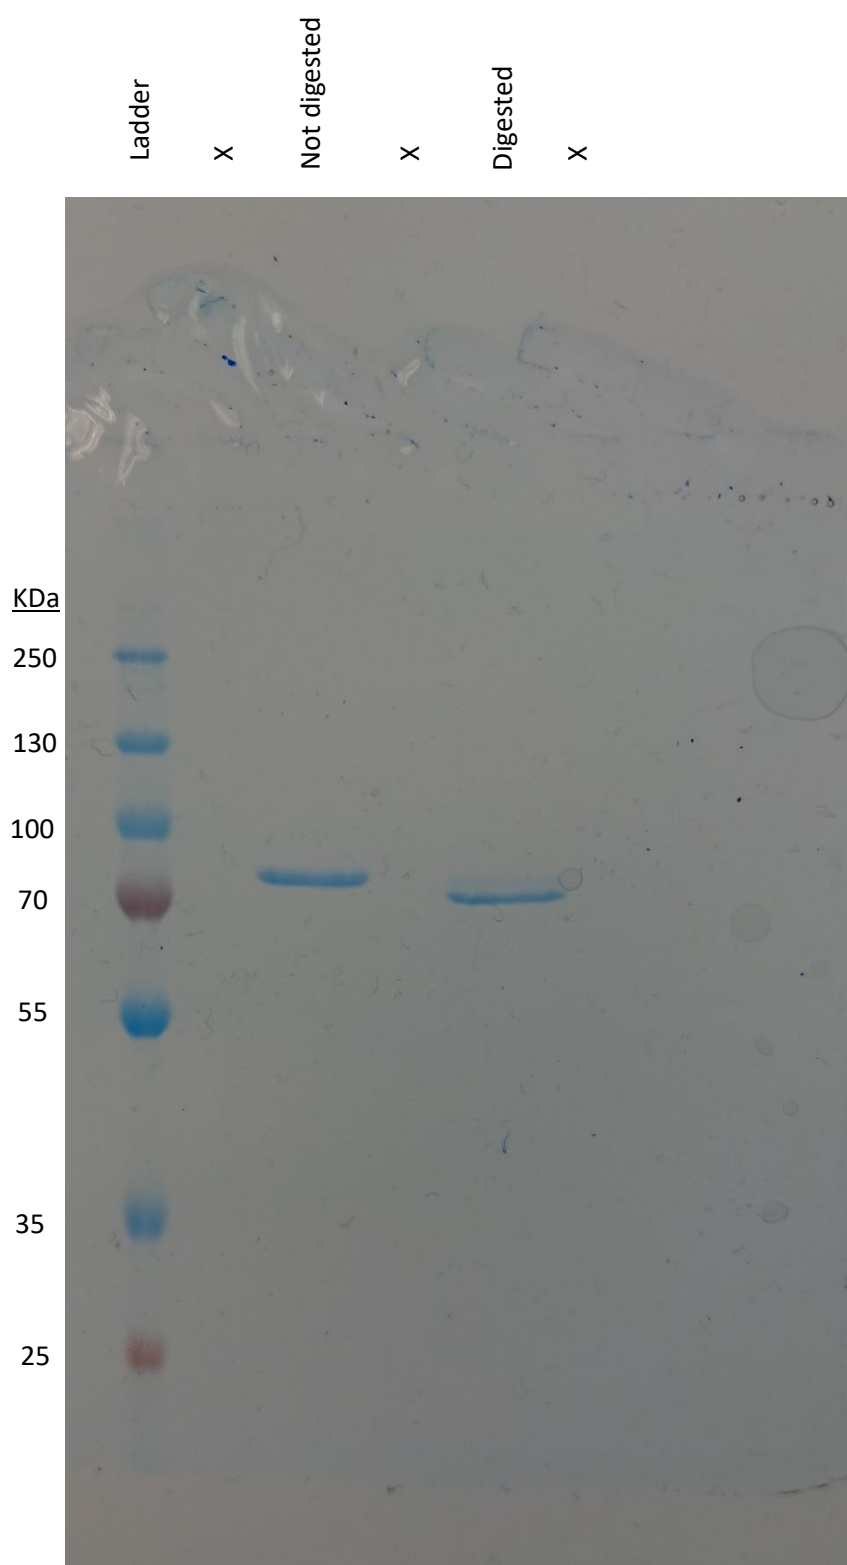

Supplement: pbio.3001764.s010.pdf [file pbio.3001764.s010.pdf]
